# Supplementary material for: Water Quality and Associated Human Health Risk Assessment Related to Some Ions and Trace Elements in a Series of Rural Roma Communities in Transylvania, Romania
Source: MDPI journal article supplement (doi:10.3390/foods13030496), 2024-02-04
Supplement: s1 [file s1]

*SUPPLEMENTARY INFORMATION*

## **Water Quality and Associated Human Health Risk Assessment Related to Some Ions and Trace Elements in a Series of Rural Roma Communities in Transylvania, Romania**

**Călina Creța <sup>1</sup>, Cristina Horga <sup>1</sup>, Mariana Vlad <sup>1</sup>, Vlad-Alexandru Pănescu <sup>2,3</sup>, Victor Bocoș-Bințișan <sup>2</sup>,  
Maria-Virginia Coman <sup>3,\*</sup>, Mihaela Cătălina Herghelegiu <sup>2,3</sup>, Vidar Berg <sup>4</sup>, Jan Ludvig Lyche <sup>4</sup>  
and Mihail Simion Beldean-Galea <sup>2,\*</sup>**

<sup>1</sup> Cluj Public Health Regional Centre, National Institute of Public Health, 6 Pasteur Str., RO-400349 Cluj-Napoca, Romania

<sup>2</sup> Faculty of Environmental Science and Engineering, Babeș-Bolyai University, 30 Fântânele Str., RO-400294 Cluj-Napoca, Romania

<sup>3</sup> "Raluca Ripan" Institute for Research in Chemistry, Babeș-Bolyai University, 30 Fântânele Str., RO-400294 Cluj-Napoca, Romania

<sup>4</sup> Faculty of Veterinary Medicine, Norwegian University of Life Sciences, 1433 Ås-Oslo, Norway

**\*** Correspondence: virginia.coman@ubbcluj.ro (M.-V.C.); simion.beldean@ubbcluj.ro (M.S.B.-G.)

The supplementary information contains 7 pages and includes 5 tables.

**List of contents of the supplementary information:**

**Table S1.** The concentration on ions (mg/L) and trace elements ( $\mu\text{g/L}$ ) in the analysed water samples from selected rural Roma communities

**Table S2.** The hazard quotient *via* ingestion route ( $\text{HQ}_{\text{ing}}$ ) for adults and children of trace elements and nitrate in selected rural Roma communities.

**Table S3.** The hazard quotient *via* dermal route ( $\text{HQ}_{\text{dermal}}$ ) expressed as value  $\times 10^{-3}$  for adults and children of trace elements and nitrate in selected rural Roma communities.

**Table S4.** The hazard index (HI) for adults and children of trace elements and nitrate in selected rural Roma communities

**Table S5.** The cancer risk (CR) for adults and children of As *via* ingestion and dermal routes in selected rural Roma communities

**Table S1.** The concentration on ions (mg/L) and trace elements (µg/L) in the analysed water samples from selected rural Roma communities

| Sample No | F <sup>-</sup> | Br <sup>-</sup> | Cl <sup>-</sup> | NO <sub>3</sub> <sup>-</sup> | SO <sub>4</sub> <sup>2-</sup> | NH <sub>4</sub> <sup>+</sup> | Cr   | Ni    | As    | Pb   | Cd   | Mn    | Cu  | Zn    | Fe    |
|-----------|----------------|-----------------|-----------------|------------------------------|-------------------------------|------------------------------|------|-------|-------|------|------|-------|-----|-------|-------|
| P1 – 1    | -              | -               | 497.9           | 62.38                        | 64.87                         | -                            | -    | 5.22  | -     | -    | -    | -     | -   | 154.5 | 107.9 |
| P2 – 1    | 0.13           | -               | 181.7           | 63.62                        | 98.04                         | 0.052                        | -    | 20.39 | -     | -    | -    | 612.1 | -   | 31.9  | 59.6  |
| P2 – 2    | 0.23           | -               | 35.54           | 9.13                         | 58.54                         | -                            | -    | -     | -     | -    | -    | 445.2 | -   | -     | 49.1  |
| P2 – 3    | 0.32           | -               | 86.65           | 211.8                        | 37.2                          | -                            | 2.09 | -     | -     | 1.99 | -    | -     | -   | 75.2  | 54.3  |
| P3 – 1    | 0.054          | -               | 1.44            | 2.04                         | 6.57                          | -                            | -    | -     | -     | -    | -    | 2.76  | -   | 45.2  | 125.2 |
| P3 – 2    | 0.094          | 0.022           | 1.18            | 0.26                         | 24.29                         | -                            | -    | -     | -     | -    | -    | 2.56  | -   | -     | 82.8  |
| P4 – 1    | 0.17           | 0.11            | 165.6           | 193.2                        | 143.3                         | -                            | -    | 3.07  | -     | -    | -    | 12.89 | 0   | -     | 76.6  |
| P4 – 2    | 0.164          | 0.02            | 27.53           | 16.95                        | 55.92                         | -                            | -    | -     | -     | -    | -    | 81.63 | 0   | -     | 97.8  |
| P4 – 3    | 0.08           | -               | 22.08           | 8.95                         | 49.22                         | -                            | -    | -     | -     | -    | -    | -     | 15  | -     | -     |
| P5 – 1    | -              | -               | 54.09           | 5.63                         | 12.67                         | -                            | -    | 2.42  | 1.97  | -    | -    | 0.91  | 0   | -     | 104.9 |
| P5 – 2    | 0.15           | 0.03            | 58.73           | 45.07                        | 82.98                         | -                            | -    | -     | -     | -    | -    | -     | 0   | 52.6  | 98.5  |
| P5 – 3    | 0.08           | -               | 87.74           | 11.29                        | 88.75                         | -                            | -    | -     | -     | -    | -    | 27.6  | 25  | 27.6  | 83.9  |
| P6 – 1    | 0.07           | -               | 22.63           | 0.49                         | 118.6                         | -                            | -    | 3.9   | 4.05  | -    | -    | 452.7 | 19  | 52.6  | 728.1 |
| P6 – 2    | 0.08           | -               | 17.33           | 0.52                         | 127                           | 0.11                         | -    | -     | -     | -    | -    | -     | 22  | 69.2  | -     |
| P6 – 3    | 0.09           | -               | 32.53           | 40.99                        | 102.7                         | -                            | -    | 4.73  | 3.09  | -    | -    | 21.7  | 180 | 153.6 | -     |
| P6 – 4    | 0.07           | -               | 19.23           | 20.28                        | 86.05                         | 0.08                         | -    | -     | -     | -    | -    | 356.4 | -   | 239.9 | 502.8 |
| P7 – 1    | -              | -               | 24.29           | 30.46                        | 39.14                         | -                            | -    | 2.79  | 8.04  | -    | 0.28 | -     | 18  | -     | -     |
| P7 – 2    | 0.09           | -               | 0.64            | -                            | 22.71                         | -                            | -    | 2.63  | 3.97  | -    | 0.11 | -     | 22  | 21.2  | -     |
| P7 – 3    | 0.03           | -               | 56.38           | 70.48                        | 68.64                         | -                            | -    | 2.87  | 3.52  | -    | 0.14 | -     | 26  | 51.4  | -     |
| P7 – 4    | 0.06           | -               | 76.95           | 55.05                        | 96.93                         | -                            | -    | 2.54  | 3.78  | -    | -    | 16.4  | 20  | -     | -     |
| P8 – 1    | 0.27           | -               | 12.53           | 71.1                         | 693.1                         | 0.11                         | 2.13 | 2.79  | -     | -    | -    | 49.8  | -   | -     | 137.5 |
| P9 – 1    | 0.17           | -               | 28.69           | 29.29                        | 99.89                         | 0.09                         | -    | -     | -     | -    | -    | 13.65 | -   | 25.2  | 132.2 |
| P9 – 2    | 0.16           | -               | 4.63            | 8.63                         | 35.29                         | -                            | -    | -     | -     | -    | -    | 2.86  | -   | -     | 100.7 |
| P9 – 3    | 0.12           | -               | 102.9           | 57.6                         | 109.9                         | -                            | 1.09 | -     | -     | -    | -    | 2.86  | -   | -     | 105.9 |
| P10 – 1   | 0.12           | -               | 13.09           | 32.64                        | 36.2                          | -                            | -    | 2.09  | -     | -    | -    | 7.21  | -   | -     | 312.8 |
| P10 – 2   | 0.14           | -               | 30.08           | 71.04                        | 46.24                         | -                            | -    | -     | -     | -    | -    | 17.09 | -   | 32.8  | 372.7 |
| P11 – 1   | 0.15           | -               | 2.53            | 0.83                         | 76.53                         | -                            | -    | -     | -     | -    | -    | 9.28  | -   | -     | 180.4 |
| P11 – 2   | 0.16           | -               | 36.7            | 16.12                        | 77.89                         | -                            | -    | -     | -     | -    | -    | 6.39  | -   | -     | 534.6 |
| P12 – 1   | 0.046          | -               | 0.47            | 1.68                         | 4.83                          | 0.15                         | -    | 2.42  | -     | -    | -    | 5.73  | 13  | -     | 125.3 |
| P12 – 2   | 0.04           | -               | 0.41            | 0.46                         | 4.24                          | 0.09                         | 1.91 | 5.04  | -     | -    | -    | 36.94 | 11  | -     | 1111  |
| P12 – 3   | 0.07           | -               | 7.37            | 13.1                         | 28.66                         | 0.08                         | -    | 2.88  | -     | -    | -    | 3.46  | -   | -     | 7.14  |
| P12 – 4   | 0.1            | -               | 1.68            | 3.27                         | 8.09                          | -                            | -    | 2.76  | -     | -    | -    | 27.47 | -   | -     | 566.3 |
| P13 – 1   | 0.09           | -               | 19.43           | 36.52                        | 32.28                         | 0.18                         | -    | -     | 2.81  | -    | -    | 4.92  | -   | -     | 67.3  |
| P13 – 2   | 0.05           | -               | 4.7             | 17.29                        | 15.54                         | 0.17                         | -    | -     | 2.55  | -    | -    | 19.36 | -   | 23.5  | -     |
| P14 – 1   | 0.11           | -               | 13.76           | 3.13                         | 36.46                         | 0.09                         | -    | -     | 2.12  | -    | 0.11 | 3.4   | -   | -     | 100   |
| P14 – 2   | 0.11           | -               | 85.03           | 51.41                        | 103.9                         | 0.09                         | -    | -     | 4.8   | -    | -    | 34.87 | -   | -     | -     |
| P14 – 3   | 0.13           | -               | 89.37           | 108.1                        | 50.93                         | 0.11                         | -    | -     | 4.2   | -    | -    | 6.42  | -   | -     | -     |
| P14 – 4   | 0.21           | -               | 222.3           | 169.4                        | 256.4                         | -                            | -    | -     | 2.64  | -    | -    | 3.65  | -   | -     | -     |
| P14 – 5   | 0.09           | -               | 149.9           | 125                          | 74.91                         | -                            | -    | -     | 2.2   | -    | -    | 4.23  | -   | -     | -     |
| P15 – 1   | 0.16           | 0.25            | 81.2            | 31.02                        | 74.83                         | -                            | -    | 2     | -     | -    | -    | 0.83  | -   | -     | 138.5 |
| P15 – 2   | 0.99           | 0.2             | 90.47           | 50.85                        | 91.36                         | 0.08                         | -    | 3.23  | -     | -    | -    | 4.47  | -   | 21.6  | 213.6 |
| P15 – 3   | 0.05           | -               | 69.78           | 20.59                        | 38.56                         | -                            | -    | 2.62  | -     | -    | -    | 18.1  | 17  | 66.8  | 239.2 |
| P16 – 1   | 0.17           | -               | 177.5           | 268.1                        | 150.9                         | -                            | -    | 5.59  | 1.81  | -    | 0.24 | -     | 23  | -     | -     |
| P16 – 2   | 0.15           | 0.28            | 430.7           | 111.4                        | 419.8                         | -                            | -    | 5.21  | 4.38  | -    | 0.53 | -     | 22  | -     | -     |
| P17 – 1   | 0.13           | -               | 191.1           | 426.9                        | 172.7                         | -                            | -    | 3.11  | 4.24  | -    | 0.11 | -     | 21  | 33.8  | -     |
| P17 – 2   | 0.15           | -               | 75.05           | 109.1                        | 111.4                         | -                            | -    | 2.55  | 2.12  | -    | -    | -     | 20  | -     | 50    |
| P18 – 1   | 0.08           | -               | 17.97           | 71.26                        | 186.6                         | -                            | 1.43 | -     | 3.81  | -    | -    | 17.09 | 18  | 43.7  | 121.5 |
| P18 – 2   | 0.55           | -               | 3.34            | 7.48                         | 98.46                         | -                            | -    | 3.57  | 1.96  | -    | -    | 8.31  | 15  | 30.1  | 142.2 |
| P18 – 3   | 0.08           | -               | 136             | 239.2                        | 963.5                         | -                            | -    | 7.42  | -     | -    | 0.17 | 4.35  | 47  | 47.8  | 99.6  |
| P19 – 1   | 0.097          | -               | 16.2            | 32.26                        | 22.5                          | -                            | -    | -     | -     | -    | -    | 7.41  | 11  | -     | 49    |
| P19 – 2   | 0.05           | -               | 85.2            | 49.26                        | 248.2                         | -                            | 2.13 | -     | -     | 1.61 | -    | 7.48  | 50  | 117.9 | 211.2 |
| P19 – 3   | 0.215          | -               | 163.6           | 154.7                        | 71.98                         | -                            | -    | 3.19  | 2.94  | -    | -    | 3.57  | 17  | 66.4  | 133   |
| P19 – 4   | 0.253          | -               | 185.2           | 51.62                        | 33.92                         | -                            | -    | 2.95  | -     | -    | -    | 2.55  | 20  | -     | 96.2  |
| P20 – 1   | -              | -               | 203.1           | 137.3                        | 82.53                         | -                            | 0.79 | 11.12 | 3.9   | -    | -    | 11.2  | 0   | -     | 68    |
| P20 – 2   | 0.11           | 0.18            | 258.4           | 167.5                        | 140.8                         | -                            | 0.78 | -     | 3.79  | -    | -    | 125.3 | 25  | 79.1  | 587.7 |
| P21 – 1   | 0.2            | -               | 3.12            | 0.17                         | 6.19                          | 0.13                         | -    | -     | 11.82 | -    | -    | 792.8 | -   | -     | 194.6 |
| P21 – 2   | 0.2            | -               | 2.96            | -                            | 6.12                          | 0.07                         | -    | -     | 4.05  | -    | -    | 676.4 | -   | -     | 525.1 |
| P21 – 3   | 0.13           | -               | 3.11            | -                            | 5.95                          | -                            | -    | -     | 7.82  | -    | -    | 623.2 | -   | -     | 103.8 |
| P21 – 4   | 0.14           | -               | 2.69            | -                            | 5.89                          | -                            | -    | -     | 5.23  | -    | -    | 551.4 | -   | -     | 84.8  |
| P22 – 1   | 0.12           | -               | 3.16            | -                            | 6.24                          | 0.45                         | -    | -     | 8.11  | -    | -    | 330.6 | -   | -     | 699.2 |
| P22 – 2   | 0.25           | 0.2             | 115.9           | 61.03                        | 158.2                         | -                            | -    | -     | 2.67  | -    | -    | 602.8 | -   | -     | 199.2 |
| P22 – 3   | 0.08           | -               | 3.25            | -                            | -                             | -                            | -    | -     | 7.17  | -    | -    | 410.9 | 11  | 28.1  | 600.3 |
| P22 – 4   | 0.22           | -               | 121.1           | 71.57                        | 158.1                         | -                            | -    | 2.25  | -     | -    | -    | 763.3 | 12  | -     | -     |
| P23 – 1   | 0.11           | -               | 85              | 52                           | 104.5                         | 0.11                         | -    | -     | 4.92  | -    | -    | 6.75  | -   | -     | -     |
| P23 – 2   | 0.15           | -               | 29.36           | 15.06                        | 46.78                         | 0.38                         | -    | -     | 6.01  | -    | -    | 2.71  | -   | -     | -     |
| P23 – 3   | 0.09           | -               | 45.79           | 14.82                        | 51.81                         | -                            | 8.24 | -     | 4.32  | -    | -    | 26.7  | 20  | -     | -     |
| P23 – 4   | 0.13           | 0.24            | 35              | 17.32                        | 46.34                         | -                            | -    | -     | 5.21  | -    | -    | 3.62  | -   | -     | -     |
| P24 – 1   | 0.59           | -               | 274             | 324                          | 261.4                         | 0.14                         | 1.49 | 4.92  | 10.29 | 1.67 | 0.18 | 33.69 | -   | -     | -     |
| P24 – 2   | 0.21           | -               | 184.5           | 612.4                        | 252.1                         | 0.8                          | 1.59 | -     | 14.02 | -    | 0.19 | 461.8 | -   | 142.3 | 465.6 |
| P24 – 3   | 0.09           | -               | 148.1           | 156.7                        | 123.7                         | -                            | -    | 6.44  | 5.38  | -    | 0.18 | 24.1  | 16  | 72.3  | 46    |
| P24 – 4   | 0.1            | -               | 154.4           | 361.3                        | 221.3                         | -                            | -    | 8.55  | 4.79  | -    | 0.14 | 248.5 | 13  | 57.3  | 46    |

“-“ not detected

**Table S2.** The hazard quotient *via* ingestion route (HQ<sub>ing</sub>) for adults and children of trace elements and nitrate in selected rural Roma communities.

| HQ                           | Person | P1    | P2    | P3    | P4    | P5    | P6    | P7    | P8    | P9    | P10   | P11   | P12   | P13   | P14   | P15   | P16   | P17   | P18   | P19   | P20   | P21   | P22   | P23   | P24    |
|------------------------------|--------|-------|-------|-------|-------|-------|-------|-------|-------|-------|-------|-------|-------|-------|-------|-------|-------|-------|-------|-------|-------|-------|-------|-------|--------|
| Cr                           | Adult  | -     | 0.019 | -     | -     | -     | -     | -     | 0.019 | 0.010 | -     | -     | 0.017 | -     | -     | -     | -     | -     | 0.013 | 0.019 | 0.007 | -     | -     | 0.074 | 0.014  |
|                              | Child  | -     | 0.029 | -     | -     | -     | -     | -     | 0.029 | 0.015 | -     | -     | 0.026 | -     | -     | -     | -     | -     | 0.020 | 0.029 | 0.011 | -     | -     | 0.113 | 0.021  |
| Ni                           | Adult  | 0.007 | 0.028 | -     | 0.004 | 0.003 | -     | -     | 0.004 | -     | 0.003 | -     | 0.004 | -     | -     | 0.004 | 0.007 | 0.004 | 0.007 | 0.004 | 0.015 | -     | 0.003 | -     | 0.009  |
|                              | Child  | 0.011 | 0.042 | -     | 0.006 | 0.005 | -     | 0.006 | 0.006 | -     | 0.004 | -     | 0.007 | -     | -     | 0.005 | 0.011 | 0.006 | 0.011 | 0.006 | 0.023 | -     | 0.005 | -     | 0.014  |
| As                           | Adult  | -     | -     | -     | -     | 1.767 | 3.200 | 4.333 | -     | -     | -     | -     | -     | 2.400 | 2.867 | -     | 2.800 | 2.867 | -     | 2.633 | 3.467 | 6.500 | 5.367 | 4.600 | 7.767  |
|                              | Child  | -     | -     | -     | -     | 2.700 | 4.867 | 6.600 | -     | -     | -     | -     | -     | 3.667 | 4.367 | -     | 4.233 | 4.333 | -     | 4.033 | 5.267 | 9.867 | 8.167 | 7.000 | 11.767 |
| Pb                           | Adult  | -     | 0.039 | -     | -     | -     | -     | -     | -     | -     | -     | -     | -     | -     | -     | -     | -     | -     | -     | 0.031 | -     | -     | -     | -     | 0.032  |
|                              | Child  | -     | 0.059 | -     | -     | -     | -     | -     | -     | -     | -     | -     | -     | -     | -     | -     | -     | -     | -     | 0.047 | -     | -     | -     | -     | 0.049  |
| Cd                           | Adult  | -     | -     | -     | -     | -     | -     | 0.010 | -     | -     | -     | -     | -     | -     | 0.006 | -     | 0.022 | 0.006 | 0.010 | -     | -     | -     | -     | -     | 0.010  |
|                              | Child  | -     | -     | -     | -     | -     | -     | 0.014 | -     | -     | -     | -     | -     | -     | 0.010 | -     | 0.032 | 0.010 | 0.014 | -     | -     | -     | -     | -     | 0.014  |
| Mn                           | Adult  | -     | 0.595 | 0.003 | 0.053 | 0.016 | 0.312 | 0.018 | 0.056 | 0.007 | 0.014 | 0.009 | 0.021 | 0.014 | 0.012 | 0.009 | -     | -     | 0.011 | 0.006 | 0.077 | 0.744 | 0.593 | 0.011 | 0.216  |
|                              | Child  | -     | 0.903 | 0.005 | 0.081 | 0.024 | 0.473 | 0.028 | 0.085 | 0.011 | 0.021 | 0.013 | 0.031 | 0.021 | 0.018 | 0.013 | -     | -     | 0.017 | 0.009 | 0.117 | 1.129 | 0.900 | 0.017 | 0.328  |
| Cu                           | Adult  | -     | -     | -     | 0.010 | 0.017 | 0.050 | 0.015 | -     | -     | -     | -     | 0.008 | -     | -     | 0.011 | 0.015 | 0.014 | 0.018 | 0.017 | 0.017 | -     | 0.008 | 0.014 | 0.010  |
|                              | Child  | -     | -     | -     | 0.026 | 0.043 | 0.126 | 0.037 | -     | -     | -     | -     | 0.021 | -     | -     | 0.029 | 0.038 | 0.035 | 0.046 | 0.042 | 0.043 | -     | 0.020 | 0.034 | 0.025  |
| Zn                           | Adult  | 0.014 | 0.005 | 0.004 | -     | 0.004 | 0.012 | 0.003 | -     | 0.002 | 0.003 | -     | -     | 0.002 | -     | 0.004 | -     | 0.003 | 0.004 | 0.008 | 0.007 | -     | 0.003 | -     | 0.008  |
|                              | Child  | 0.021 | 0.007 | 0.006 | -     | 0.005 | 0.018 | 0.005 | -     | 0.003 | 0.004 | -     | -     | 0.003 | -     | 0.006 | -     | 0.005 | 0.006 | 0.013 | 0.011 | -     | 0.004 | -     | 0.012  |
| Fe                           | Adult  | 0.010 | 0.005 | 0.009 | 0.008 | 0.009 | 0.055 | -     | 0.012 | 0.010 | 0.031 | 0.032 | 0.041 | 0.006 | 0.009 | 0.018 | -     | 0.005 | 0.011 | 0.011 | 0.030 | 0.020 | 0.045 | -     | 0.017  |
|                              | Child  | 0.015 | 0.007 | 0.014 | 0.012 | 0.013 | 0.084 | -     | 0.019 | 0.015 | 0.047 | 0.049 | 0.062 | 0.009 | 0.014 | 0.027 | -     | 0.007 | 0.017 | 0.017 | 0.045 | 0.031 | 0.068 | -     | 0.025  |
| NO <sub>3</sub> <sup>-</sup> | Adult  | 1.053 | 1.600 | 0.019 | 1.232 | 0.349 | 0.263 | 0.878 | 1.200 | 0.537 | 0.875 | 0.143 | 0.078 | 0.454 | 1.543 | 0.576 | 3.202 | 4.523 | 1.788 | 1.215 | 2.572 | 0.003 | 1.119 | 0.417 | 6.135  |
|                              | Child  | 1.598 | 2.430 | 0.029 | 1.871 | 0.529 | 0.399 | 1.333 | 1.822 | 0.816 | 1.328 | 0.217 | 0.119 | 0.689 | 2.342 | 0.875 | 4.862 | 6.868 | 2.716 | 1.844 | 3.906 | 0.004 | 1.699 | 0.633 | 9.317  |

“–” not calculated

**Table S3.** The hazard quotient *via* dermal route (HQ<sub>dermal</sub>) expressed as value x 10<sup>-3</sup> for adults and children of trace elements and nitrate in selected rural Roma communities.

| HQ                           | Person | P1    | P2    | P3    | P4    | P5   | P6    | P7   | P8    | P9   | P10  | P11  | P12   | P13  | P14   | P15  | P16   | P17  | P18   | P19   | P20   | P21   | P22   | P23   | P24   |
|------------------------------|--------|-------|-------|-------|-------|------|-------|------|-------|------|------|------|-------|------|-------|------|-------|------|-------|-------|-------|-------|-------|-------|-------|
| Cr                           | Adult  | -     | 8.00  | -     | -     | -    | -     | -    | 8.13  | 4.13 | -    | -    | 7.33  | -    | -     | -    | -     | -    | 5.47  | 8.13  | 3.07  | -     | -     | 31.47 | 5.87  |
|                              | Child  | -     | 4.67  | -     | -     | -    | -     | -    | 4.80  | 2.40 | -    | -    | 4.27  | -    | -     | -    | -     | -    | 3.20  | 4.80  | 1.73  | -     | -     | 18.40 | 3.47  |
| Ni                           | Adult  | 0.19  | 0.73  | -     | 0.11  | 0.09 | 0.15  | 0.10 | 0.10  | -    | 0.08 | -    | 0.11  | -    | -     | 0.10 | 0.19  | 0.10 | 0.20  | 0.11  | 0.40  | -     | 0.08  | -     | 0.24  |
|                              | Child  | 0.11  | 0.43  | -     | 0.06  | 0.05 | 0.09  | 0.06 | 0.06  | -    | 0.05 | -    | 0.08  | -    | -     | 0.05 | 0.11  | 0.06 | 0.11  | 0.06  | 0.24  | -     | 0.05  | -     | 0.14  |
| As                           | Adult  | -     | -     | -     | -     | 0.98 | 1.79  | 2.42 | -     | -    | -    | -    | -     | 1.33 | 1.61  | -    | 1.54  | 1.61 | -     | 1.47  | 1.93  | 3.61  | 3.02  | 2.56  | 4.32  |
|                              | Child  | -     | -     | -     | -     | 0.60 | 1.05  | 1.44 | -     | -    | -    | -    | -     | 0.81 | 0.95  | -    | 0.91  | 0.95 | -     | 0.88  | 1.12  | 2.14  | 1.75  | 1.51  | 2.53  |
| Pb                           | Adult  | -     | 0.07  | -     | -     | -    | -     | -    | -     | -    | -    | -    | -     | -    | -     | -    | -     | -    | -     | 0.05  | -     | -     | -     | -     | 0.05  |
|                              | Child  | -     | 0.05  | -     | -     | -    | -     | -    | -     | -    | -    | -    | -     | -    | -     | -    | -     | -    | -     | 0.02  | -     | -     | -     | -     | 0.02  |
| Cd                           | Adult  | -     | -     | -     | -     | -    | -     | 1.20 | -     | -    | -    | -    | -     | -    | 0.80  | -    | 2.40  | 0.80 | 0.80  | -     | -     | -     | -     | -     | 0.80  |
|                              | Child  | -     | -     | -     | -     | -    | -     | 0.80 | -     | -    | -    | -    | -     | -    | 0.40  | -    | 1.20  | 0.40 | 0.40  | -     | -     | -     | -     | -     | 0.40  |
| Mn                           | Adult  | -     | 78.74 | 0.40  | 7.04  | 2.13 | 41.25 | 2.45 | 7.42  | 0.96 | 1.81 | 1.17 | 2.74  | 1.81 | 1.56  | 1.17 | -     | -    | 1.48  | 0.78  | 10.17 | 98.45 | 78.49 | 1.48  | 28.60 |
|                              | Child  | -     | 46.25 | 0.23  | 4.14  | 1.25 | 24.23 | 1.44 | 4.35  | 0.56 | 1.06 | 0.69 | 1.61  | 1.06 | 0.92  | 0.69 | -     | -    | 0.86  | 0.46  | 5.97  | 57.83 | 46.10 | 0.88  | 16.80 |
| Cu                           | Adult  | -     | -     | -     | 0.18  | 0.30 | 0.88  | 0.26 | -     | -    | -    | -    | 0.14  | -    | -     | 0.20 | 0.27  | 0.24 | 0.32  | 0.29  | 0.30  | -     | 0.14  | 0.24  | 0.17  |
|                              | Child  | -     | -     | -     | 0.11  | 0.18 | 0.52  | 0.15 | -     | -    | -    | -    | 0.08  | -    | -     | 0.12 | 0.16  | 0.14 | 0.19  | 0.17  | 0.18  | -     | 0.08  | 0.14  | 0.10  |
| Zn                           | Adult  | 0.22  | -     | 0.06  | -     | 0.06 | 0.18  | 0.05 | -     | 0.04 | -    | -    | -     | 0.03 | -     | 0.06 | -     | 0.05 | 0.06  | 0.13  | 0.11  | -     | 0.04  | -     | 0.13  |
|                              | Child  | 0.13  | 0.05  | 0.04  | -     | 0.03 | 0.11  | 0.03 | -     | 0.02 | 0.03 | -    | -     | 0.02 | -     | 0.04 | -     | 0.03 | 0.03  | 0.08  | 0.07  | -     | 0.02  | -     | 0.08  |
| Fe                           | Adult  | 0.34  | 0.17  | 0.33  | 0.28  | 0.30 | 1.96  |      | 0.44  | 0.36 | 1.09 | 1.14 | 1.44  | 0.21 | 0.32  | 0.63 | -     | 0.16 | 0.38  | 0.39  | 1.04  | 0.72  | 1.59  | -     | 0.59  |
|                              | Child  | 0.20  | 0.10  | 0.19  | 0.16  | 0.18 | 1.15  |      | 0.26  | 0.21 | 0.64 | 0.67 | 0.84  | 0.13 | 0.19  | 0.37 | -     | 0.09 | 0.23  | 0.23  | 0.61  | 0.42  | 0.93  | -     | 0.35  |
| NO <sub>3</sub> <sup>-</sup> | Adult  | 11.15 | 16.95 | 0.20  | 13.05 | 3.68 | 2.78  | 9.30 | 12.71 | 5.68 | 9.26 | 1.51 | 0.825 | 4.81 | 16.33 | 6.10 | 33.91 | 47.9 | 18.95 | 12.86 | 27.2  | 0.025 | 11.85 | 4.413 | 64.98 |
|                              | Child  | 6.55  | 9.96  | 0.125 | 7.66  | 2.17 | 1.63  | 5.46 | 7.46  | 3.33 | 5.43 | 0.88 | 0.488 | 2.82 | 9.60  | 3.58 | 19.92 | 28.1 | 11.12 | 7.56  | 16.0  | 0.013 | 6.96  | 2.600 | 38.17 |

“-“ not calculated

**Table S4.** The hazard index (HI) for adults and children of trace elements and nitrate in selected rural Roma communities

| HI                           | Person | P1    | P2    | P3    | P4    | P5    | P6    | P7    | P8    | P9    | P10   | P11   | P12   | P13   | P14   | P15   | P16   | P17   | P18   | P19   | P20   | P21   | P22   | P23   | P24    |
|------------------------------|--------|-------|-------|-------|-------|-------|-------|-------|-------|-------|-------|-------|-------|-------|-------|-------|-------|-------|-------|-------|-------|-------|-------|-------|--------|
| Cr                           | Adult  | -     | 0.027 | -     | -     | -     | -     | -     | 0.027 | 0.014 | -     | -     | 0.025 | -     | -     | -     | -     | -     | 0.018 | 0.027 | 0.010 | -     | -     | 0.105 | 0.020  |
|                              | Child  | -     | 0.033 | -     | -     | -     | -     | -     | 0.034 | 0.017 | -     | -     | 0.030 | -     | -     | -     | -     | -     | 0.023 | 0.034 | 0.012 | -     | -     | 0.131 | 0.024  |
| Ni                           | Adult  | 0.007 | 0.028 | -     | 0.004 | 0.003 | 0.006 | 0.004 | 0.004 | -     | 0.003 | -     | 0.005 | -     | -     | 0.004 | 0.007 | 0.004 | 0.008 | 0.004 | 0.015 | -     | 0.003 | -     | 0.009  |
|                              | Child  | 0.011 | 0.042 | -     | 0.006 | 0.005 | 0.009 | 0.006 | 0.006 | -     | 0.004 | -     | 0.007 | -     | -     | 0.005 | 0.011 | 0.006 | 0.011 | 0.006 | 0.023 | -     | 0.005 | -     | 0.014  |
| As                           | Adult  | -     | -     | -     | -     | 1.768 | 3.202 | 4.336 | -     | -     | -     | -     | -     | 2.401 | 2.868 | -     | 2.802 | 2.868 | -     | 2.635 | 3.469 | 6.504 | 5.370 | 4.603 | 7.771  |
|                              | Child  | -     | -     | -     | -     | 2.701 | 4.868 | 6.601 | -     | -     | -     | -     | -     | 3.667 | 4.368 | -     | 4.234 | 4.334 | -     | 4.034 | 5.268 | 9.869 | 8.168 | 7.002 | 11.769 |
| Pb                           | Adult  | -     | 0.039 | -     | -     | -     | -     | -     | -     | -     | -     | -     | -     | -     | -     | -     | -     | -     | -     | 0.031 | -     | -     | -     | -     | 0.032  |
|                              | Child  | -     | 0.059 | -     | -     | -     | -     | -     | -     | -     | -     | -     | -     | -     | -     | -     | -     | -     | -     | 0.047 | -     | -     | -     | -     | 0.049  |
| Cd                           | Adult  | -     | -     | -     | -     | -     | -     | 0.011 | -     | -     | -     | -     | -     | -     | 0.007 | -     | 0.024 | 0.007 | 0.011 | -     | -     | -     | -     | -     | 0.011  |
|                              | Child  | -     | -     | -     | -     | -     | -     | 0.015 | -     | -     | -     | -     | -     | -     | 0.010 | -     | 0.033 | 0.010 | 0.014 | -     | -     | -     | -     | -     | 0.014  |
| Mn                           | Adult  | -     | 0.673 | 0.003 | 0.060 | 0.018 | 0.353 | 0.021 | 0.063 | 0.008 | 0.015 | 0.010 | 0.023 | 0.015 | 0.013 | 0.010 | -     | -     | 0.013 | 0.007 | 0.087 | 0.842 | 0.671 | 0.013 | 0.245  |
|                              | Child  | -     | 0.949 | 0.005 | 0.085 | 0.026 | 0.497 | 0.029 | 0.089 | 0.012 | 0.022 | 0.014 | 0.033 | 0.022 | 0.019 | 0.014 | -     | -     | 0.018 | 0.009 | 0.123 | 1.187 | 0.946 | 0.018 | 0.345  |
| Cu                           | Adult  | -     | -     | -     | 0.010 | 0.017 | 0.051 | 0.015 | -     | -     | -     | -     | 0.008 | -     | -     | 0.012 | 0.015 | 0.014 | 0.018 | 0.017 | 0.017 | -     | 0.008 | 0.014 | 0.010  |
|                              | Child  | -     | -     | -     | 0.026 | 0.043 | 0.126 | 0.037 | -     | -     | -     | -     | 0.021 | -     | -     | 0.029 | 0.039 | 0.035 | 0.046 | 0.042 | 0.043 | -     | 0.020 | 0.034 | 0.025  |
| Zn                           | Adult  | 0.014 | 0.005 | 0.004 | -     | 0.004 | 0.012 | 0.003 | -     | 0.002 | 0.003 | -     | -     | 0.002 | -     | 0.004 | -     | 0.003 | 0.004 | 0.008 | 0.007 | -     | 0.003 | -     | 0.008  |
|                              | Child  | 0.021 | 0.007 | 0.006 | -     | 0.006 | 0.018 | 0.005 | -     | 0.003 | 0.005 | -     | -     | 0.003 | -     | 0.006 | -     | 0.005 | 0.006 | 0.013 | 0.011 | -     | 0.004 | -     | 0.012  |
| Fe                           | Adult  | 0.010 | 0.005 | 0.010 | 0.008 | 0.009 | 0.057 | -     | 0.013 | 0.011 | 0.032 | 0.033 | 0.042 | 0.006 | 0.009 | 0.018 | -     | 0.005 | 0.011 | 0.011 | 0.031 | 0.021 | 0.047 | -     | 0.017  |
|                              | Child  | 0.015 | 0.008 | 0.014 | 0.012 | 0.013 | 0.085 | -     | 0.019 | 0.016 | 0.047 | 0.050 | 0.063 | 0.009 | 0.014 | 0.027 | -     | 0.007 | 0.017 | 0.017 | 0.045 | 0.031 | 0.069 | -     | 0.026  |
| NO <sub>3</sub> <sup>-</sup> | Adult  | 1.064 | 1.617 | 0.020 | 1.245 | 0.352 | 0.266 | 0.887 | 1.213 | 0.543 | 0.884 | 0.145 | 0.079 | 0.459 | 1.559 | 0.582 | 3.236 | 4.571 | 1.807 | 1.228 | 2.599 | 0.003 | 1.131 | 0.422 | 6.200  |
|                              | Child  | 1.605 | 2.440 | 0.030 | 1.879 | 0.532 | 0.401 | 1.338 | 1.829 | 0.819 | 1.334 | 0.218 | 0.119 | 0.692 | 2.352 | 0.879 | 4.882 | 6.896 | 2.727 | 1.852 | 3.922 | 0.004 | 1.706 | 0.636 | 9.355  |

“–” not calculated

**Table S5.** The cancer risk (CR) for adults and children of As *via* ingestion and dermal routes in selected rural Roma communities

| Person | CR <i>via</i> ingestion x 10 <sup>-4</sup>       |    |    |    |      |      |      |    |    |     |     |     |      |      |     |      |      |     |      |      |      |      |      |      |
|--------|--------------------------------------------------|----|----|----|------|------|------|----|----|-----|-----|-----|------|------|-----|------|------|-----|------|------|------|------|------|------|
|        | P1                                               | P2 | P3 | P4 | P5   | P6   | P7   | P8 | P9 | P10 | P11 | P12 | P13  | P14  | P15 | P16  | P17  | P18 | P19  | P20  | P21  | P22  | P23  | P24  |
| Adult  | -                                                | -  | -  | -  | 0.8  | 1.44 | 1.95 | -  | -  | -   | -   | -   | 1.08 | 1.29 | -   | 1.26 | 1.29 | -   | 1.18 | 1.56 | 2.93 | 2.42 | 2.07 | 3.50 |
| Child  | -                                                | -  | -  | -  | 1.22 | 2.19 | 2.97 | -  | -  | -   | -   | -   | 1.65 | 1.97 | -   | 1.91 | 1.95 | -   | 1.82 | 2.37 | 4.44 | 3.68 | 3.15 | 5.30 |
| Person | CR <i>via</i> dermal exposure x 10 <sup>-6</sup> |    |    |    |      |      |      |    |    |     |     |     |      |      |     |      |      |     |      |      |      |      |      |      |
|        | P1                                               | P2 | P3 | P4 | P5   | P6   | P7   | P8 | P9 | P10 | P11 | P12 | P13  | P14  | P15 | P16  | P17  | P18 | P19  | P20  | P21  | P22  | P23  | P24  |
| Adult  | -                                                | -  | -  | -  | 1.01 | 1.84 | 2.48 | -  | -  | -   | -   | -   | 1.37 | 1.66 | -   | 1.58 | 1.66 | -   | 1.51 | 1.98 | 3.71 | 3.10 | 2.63 | 4.43 |
| Child  | -                                                | -  | -  | -  | 0.61 | 1.01 | 1.48 | -  | -  | -   | -   | -   | 0.83 | 0.97 | -   | 0.94 | 0.97 | -   | 0.90 | 1.15 | 2.20 | 1.80 | 1.55 | 2.59 |

“–“ not calculated
